# Supplementary material for: Potential-induced reversible switching in the tubular structure of conducting polypyrrole nanotube arrays
Source: Royal Society of Chemistry journal article supplement (doi:10.1039/c3ra42172d), 2013-01-01
Supplement: c3ra42172d.pdf [file c3ra42172d.pdf]

## Supplementary Information

### Potential-induced Reversible Switch in Tubular Structure of Conducting Polypyrrole Nanotube Arrays

Jingwen Liao,<sup>‡,a</sup> Shishu Huang,<sup>‡,b</sup> Chengyun Ning,<sup>\*,a</sup> Guoxin Tan,<sup>c</sup> Haobo Pan<sup>\*,b,d</sup> and Yu Zhang<sup>e</sup>

<sup>a</sup>School of Materials Science and Engineering, South China University of Technology, Guangzhou 510641, China. E-mail: imcyning@scut.edu.cn; Fax: 86-020-22236088(0); Tel: 86-13719286823

<sup>b</sup>Center for Human Tissues and Organs Degeneration, Shenzhen Institute of Advanced Technology, Chinese Academy of Science, Shenzhen 518055, China. E-mail: sshandld@gmail.com; Tel: 86-0755-86585233

<sup>c</sup>Institute of Chemical Engineering and Light Industry, Guangdong University of Technology, Guangzhou 510006, China. E-mail: tanguoxin@126.com; Tel: 86-13631419254

<sup>d</sup>Department of Orthopedics and Traumatology, The University of Hong Kong, Hong Kong SAR 999077, China. E-mail: haobo@hku.hk; Fax: 852-28185210; Tel: 852-64180653

<sup>e</sup>General Hospital of Guangzhou Military Command of PLA, Guangzhou 510010, China. E-mail: luck\_2001@126.com; Tel: 86-020-86654541

### Experimental details

**Fabrication of CPNAs** The small electrochemical cell included biomedical titanium sheet (thickness of 0.2 mm, effective area of 15 mm×15 mm, ASTM F-67-2000) as working electrode, copper sheet as counter electrode, saturated calomel electrode (SCE) as reference electrode, a 0.2 M KCl solution as electrolyte containing 0.1 M Py. A prenucleation film (PNF) was obtained at 0.8 V (vs SCE) for 20 s at room temperature under the control of electrochemical station (Zennium Zahner, Germany), and dried in a vacuum atmosphere. Typically, in phosphate buffer solution (PBS, 0.5 M, pH 6.8) as electrolyte containing 0.2 M Py and 0.01 M  $\beta$ -naphthalenesulfonic acid (NSA), template-free electrochemical polymerization was used to galvanostatically (0.9 mA/cm<sup>2</sup>) fabricate CPNAs on prenucleation film/biomedical titanium (as working electrode). The as-obtained products were rinsed for several times in deionized water, and dried under vacuum.

**Switchable property for tubular structure** To ascertain the redox potentials of CPNAs and PNF, cyclic voltammetry (CV) was utilized in a electrochemical system including PBS (pH 6.8) as electrolyte containing 0.01M NSA, PPy nanotube coating/titanium sheet as working electrode, platinum electrode as counter electrode, and SCE as reference electrode. The CV curve was recorded by applying scanning voltage from -0.05 V to -1.00 V at a scan rate of 10mV/s. The switchable property for tubular structure of CPNAs was analyzed in the aforementioned electrochemical system. At first, a closed tubular structure (closed state) was formed by applying -0.80 V for 10 min (switch-close potential) to as obtained CPNAs, and open tubular structure (open state) by -0.15 V for another 10 min (switch-open potential) to CPNAs of closed state. The reversible open/closed (switchable) states of tubular structure was performed in the switch between switch-open/close potentials, switch was underwent for required cycles.

**Characterization** Field emission scanning electron microscopy (FE-SEM, ZEISS Ultra 55, Germany) was employed to examine the morphology of CPNAs, and the image signal was received by E-T detector, if no additional description. Electron probe micro-analyzer (EPMA, Shimadzu) was utilized to compare the composition of CPNAs in various tubular states.

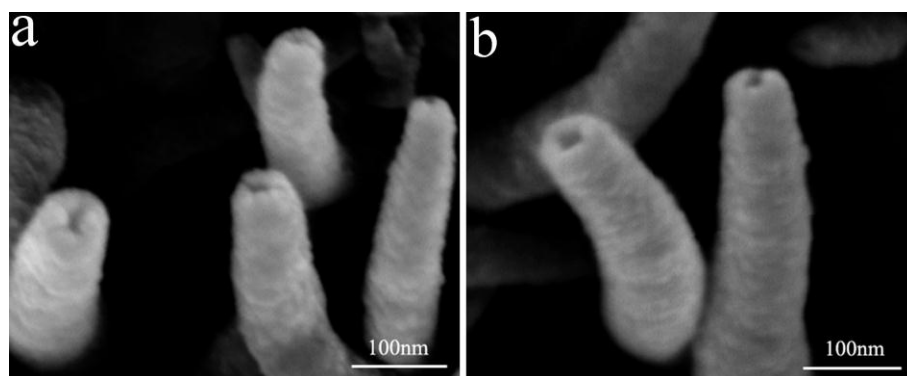

**Figure. S1** FE-SEM images of CPNAs by (a) applying a potential of -0.65V less negative than -0.80 V, and (b) applying -0.25 V less positive than -0.15 V.

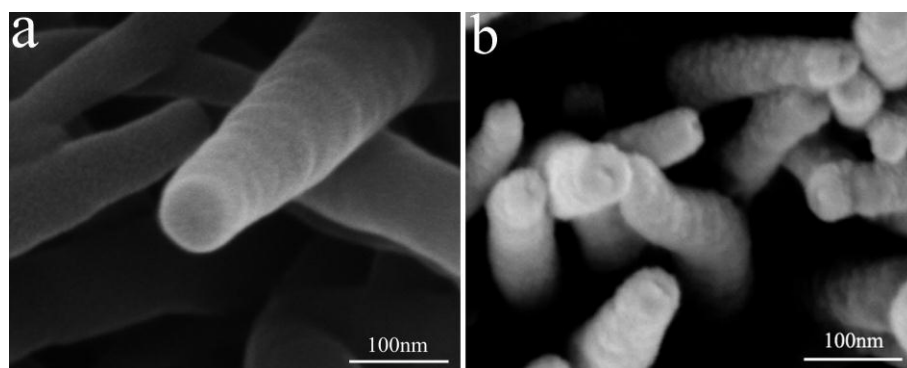

**Figure. S2** FE-SEM images of CPNAs by (a) applying switch-open/close potentials with cycle of 1000 and follow by subsequent 0.05 V for 30 min, and (b) applying -0.80 V for 60 min and subsequent 0.05 V for 30min.
